# Supplementary material for: Global Dynamic Rainfall-Induced Landslide Susceptibility Mapping Using Machine Learning
Source: MDPI journal article supplement (doi:10.3390/rs14225795), 2022-11-16
Supplement: s1 [file s1]

Archive with 1 entries (1 files):
- remotesensing-1982374-supplementary.pdf
