# Supplementary material for: Global Dynamic Rainfall-Induced Landslide Susceptibility Mapping Using Machine Learning
Source: MDPI journal article supplement (doi:10.3390/rs14225795), 2022-11-16
Supplement: s1 [file s1 › remotesensing-1982374-supplementary.pdf]

Supplementary material for

**Global dynamic rainfall-induced landslide susceptibility mapping  
using machine learning**

**Bohao Li<sup>1</sup>, Kai Liu<sup>1,2\*</sup>, Ming Wang<sup>1</sup>, Qian He<sup>1</sup>, Ziyu Jiang<sup>1</sup>, Weihua Zhu<sup>1</sup>, Ningning**

**Qiao<sup>1</sup>**

*<sup>1</sup>School of National Safety and Emergency Management, Beijing Normal University, 19  
Xinjiekou Wai Ave., Beijing 100875, China.*

*<sup>2</sup>Collaborative Innovation Center on Forecast and Evaluation of Meteorological  
Disasters (CIC-FEMD), Nanjing University of Information Science & Technology, China*

**\* Corresponding author. E-mail address: liukai@bnu.edu.cn (Kai Liu);**

**Full postal address: School of National Safety and Emergency Management, Beijing  
Normal University, #19 Xinjiekou Wai Ave., Beijing 100875, China.**

**Table S1** presents the data sources and citations for the landslide points used

**Figures S1-S2** shows all the features used by the global dynamic rainfall-induced landslides susceptibility mapping model.

**Figure S3** shows the dynamic landslide influencing factors used in the prediction case

**Table S1**

| Event<br>import<br>source | Name                                                                                                                           | Link                                                                                                                                                                                                                                                                                                                  | Citation |
|---------------------------|--------------------------------------------------------------------------------------------------------------------------------|-----------------------------------------------------------------------------------------------------------------------------------------------------------------------------------------------------------------------------------------------------------------------------------------------------------------------|----------|
| GLC                       | Global<br>Landslide<br>Catalog                                                                                                 | <a href="https://landslides.nasa.gov">https://landslides.nasa.gov</a>                                                                                                                                                                                                                                                 | [1]      |
| LRC                       | Landslide<br>Reporter<br>Catalog                                                                                               | <a href="https://landslides.nasa.gov/reporter">https://landslides.nasa.gov/reporter</a>                                                                                                                                                                                                                               | [2]      |
| Combeima                  | Spatio-temporal<br>distribution<br>of slides<br>(1999-2015)<br>in<br>Combeima's<br>River<br>hydrographic<br>basin,<br>Colombia | <a href="https://www.researchgate.net/publication/328229319_Spatio-temporal_distribution_of_slides_1999-2015_in_Combeima_s_River_hydrographic_basin_Colombia">https://www.researchgate.net/publication/328229319_Spatio-temporal_distribution_of_slides_1999-2015_in_Combeima_s_River_hydrographic_basin_Colombia</a> | [3]      |
| LIWEAR                    | Landslide<br>Inventory for<br>the central<br>section of the<br>Western<br>branch of the<br>East African<br>Rift<br>(LIWEAR)    | <a href="https://doi.org/10.1007/s10346-018-1008-y">https://doi.org/10.1007/s10346-018-1008-y</a>                                                                                                                                                                                                                     | [4]      |
| RMD                       | Republic of<br>Macedonia<br>Database                                                                                           |                                                                                                                                                                                                                                                                                                                       | [5]      |
| SMMML                     | SERVIR-<br>Mekong<br>Myanmar<br>Mapathon<br>Landslides                                                                         | <a href="https://servir.adpc.net">https://servir.adpc.net</a>                                                                                                                                                                                                                                                         | [6]      |
| CAS                       | Czech<br>Academy of                                                                                                            | <a href="https://www.irms.cas.cz/landslides">https://www.irms.cas.cz/landslides</a>                                                                                                                                                                                                                                   | [7]      |

---

|         |                                                         |                                                                                                                                                               |         |
|---------|---------------------------------------------------------|---------------------------------------------------------------------------------------------------------------------------------------------------------------|---------|
|         | Sciences                                                |                                                                                                                                                               |         |
|         | Landslides                                              |                                                                                                                                                               |         |
|         | Inventory                                               |                                                                                                                                                               |         |
|         | Based on                                                |                                                                                                                                                               |         |
|         | Media                                                   |                                                                                                                                                               |         |
|         | Reports                                                 |                                                                                                                                                               |         |
| ODOT    | Oregon Department of Transportation                     | <a href="https://www.oregon.gov/odot/GeoEnvironmental/Pages/Unstable-Slopes.aspx">https://www.oregon.gov/odot/GeoEnvironmental/Pages/Unstable-Slopes.aspx</a> | -       |
|         | Landslide Inventory                                     |                                                                                                                                                               |         |
| Reuleut | Reuleut Landslide Inventory                             | <a href="https://landslides.nasa.gov">https://landslides.nasa.gov</a>                                                                                         | [8]     |
| Porgera | Porgera Landslide Inventory                             | <a href="https://landslides.nasa.gov">https://landslides.nasa.gov</a>                                                                                         | [8]     |
| SKP     | Sulawesi-Kasiguncu-Palu Landslide Inventory             | <a href="https://landslides.nasa.gov">https://landslides.nasa.gov</a>                                                                                         | [8]     |
| Pokot   | Pokot Landslide Inventory                               | <a href="https://landslides.nasa.gov">https://landslides.nasa.gov</a>                                                                                         | [9]     |
| LMR     | Rainfall-induced landslide inventories for Lower Mekong | <a href="https://doi.org/10.1002/gdj3.145">https://doi.org/10.1002/gdj3.145</a>                                                                               | [10,11] |

---

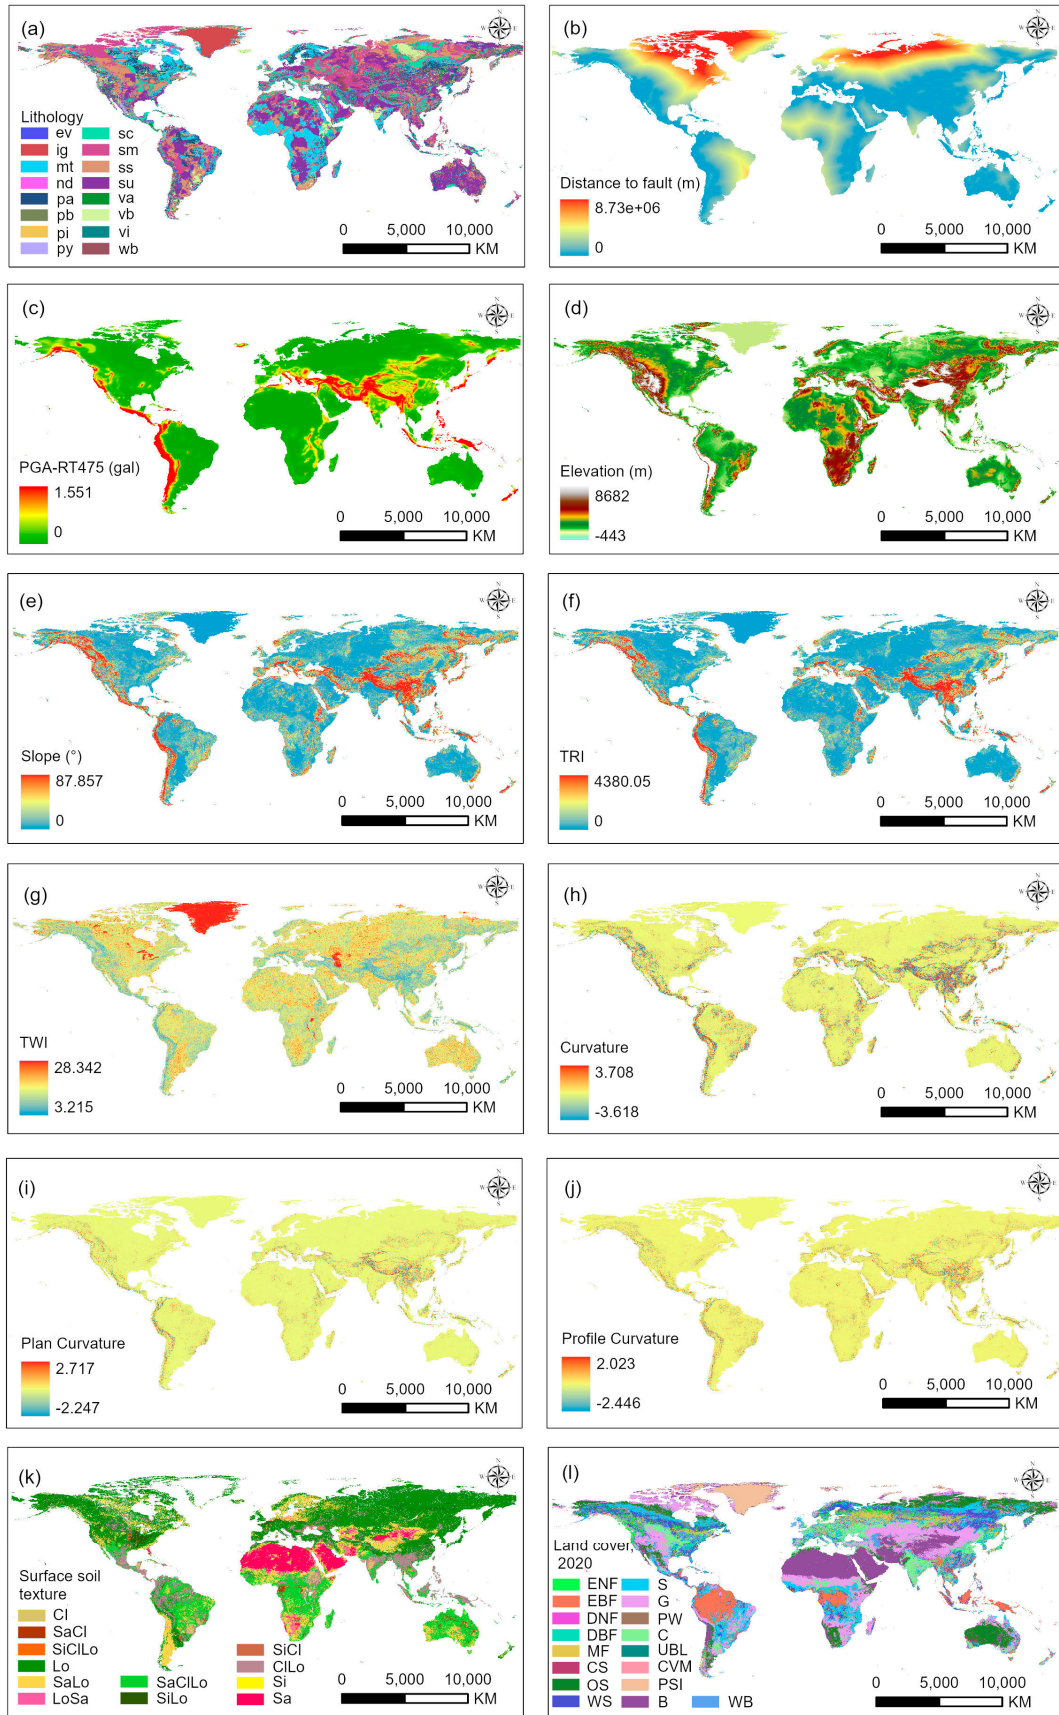

**Figure S1.** (a) lithology, ev: evaporites, sc: carbonate sedimentary rocks, ig: ice and glaciers, sm: mixed sedimentary rocks, mt: metamorphics, ss: siliciclastic sedimentary rocks, nd: nodata, su:

unconsolidated sediments, pa: acidic plutonic rocks, va: acidic volcanic rocks, pb: basic plutonic rocks, pi: intermediate plutonic rocks, vi: intermediate volcanic rocks, py: pyroclastics, wb: water bodies, (b) distance to fault, (c) 475-year return period PGA, (d) elevation, (e) slope, (f) TRI, (g) TWI, (h) curvature, (i) plan curvature, (j) profile curvature, (k) surface soil texture, and (l) landcover in 2020, ENF: Evergreen Needleleaf Forests, EBF: Evergreen Broadleaf Forests, DNF: Deciduous Needleleaf Forests, DBF: Deciduous Broadleaf Forests, MF: Mixed Forests, CS: Closed Shrublands, OS: Open Shrublands, WS: Woody Savannas, S: Savannas, G: Grasslands, PW: Permanent Wetlands, C: Croplands, UBL: Urban and Built-up Lands, CVM: Cropland/Natural Vegetation Mosaics, PSI: Permanent Snow and Ice, B: Barren, WB: Water Bodies. The source of lithology is GLIM. The global fault data was obtained from GAF-DB. 475-year return period PGA derived from Global Seismic Hazard Map. The sources of the DEM data are SRTM and GMTED. We obtained elevation, slope, TRI, TWI, curvature, plan curvature and profile curvature based on the DEM data. Soil texture was downloaded from OpenLandMap.org. Land cover was obtained from MODIS product (MCD12Q1 V6).

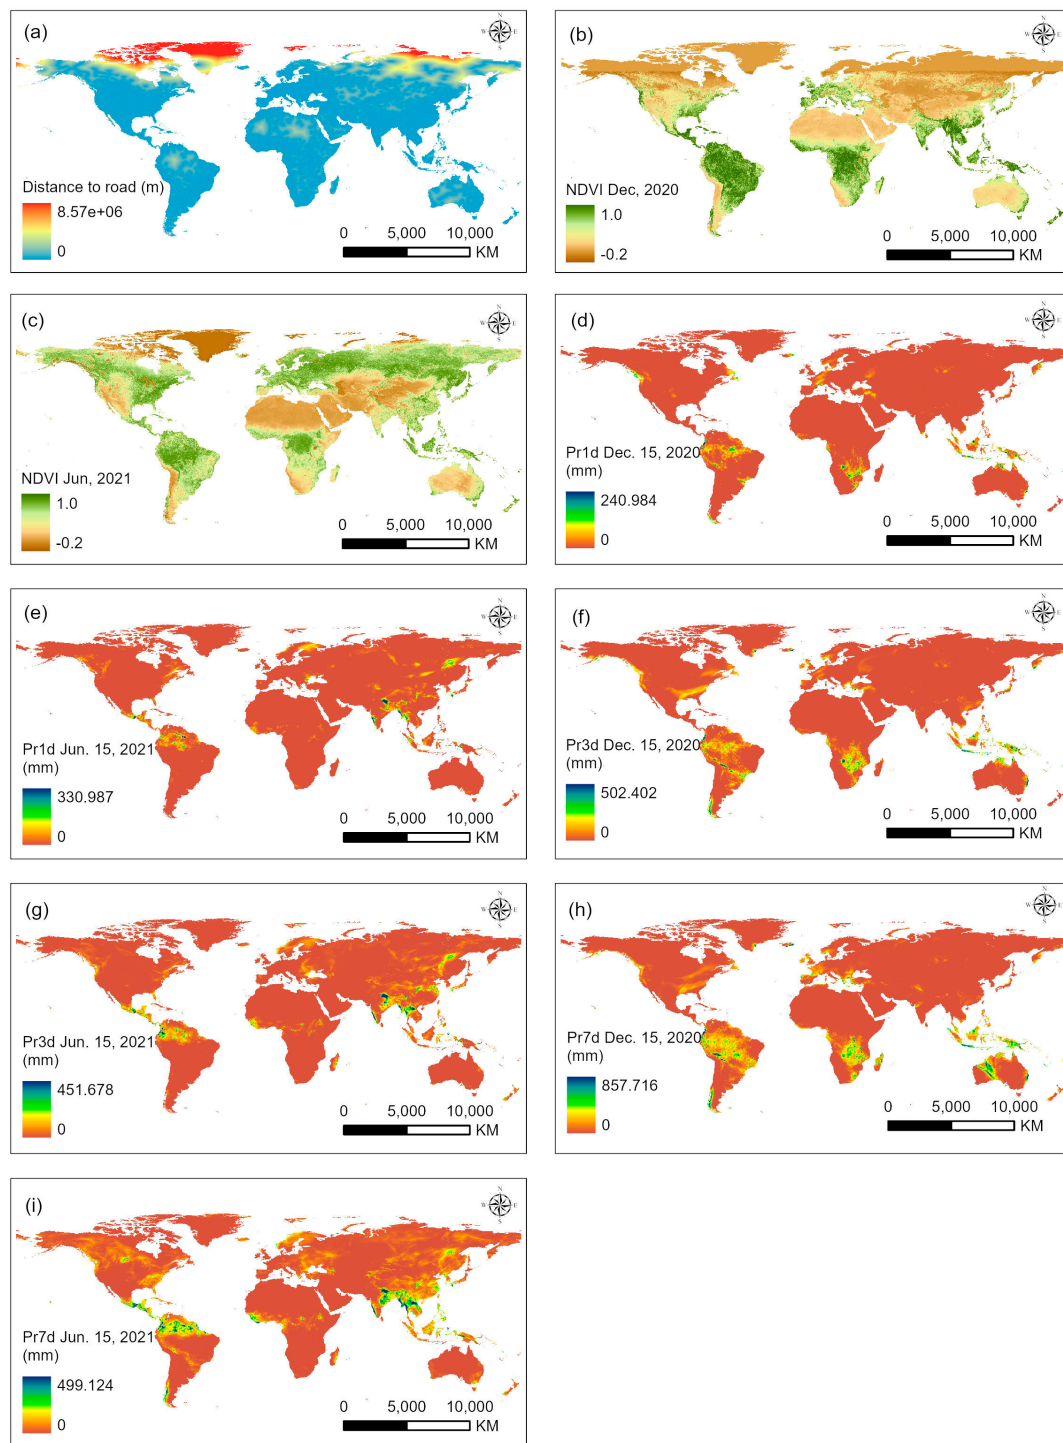

**Figure S2.** (a) distance to road, (b) NDVI December, 2020, (c) NDVI June, 2021, (d) Pr1d December 15, 2020, (e) Pr1d June 15, 2021, (f) Pr3d December 15, 2020, (g) Pr3d June 15, 2021, (h) Pr7d December 15, 2020, and (i) Pr7d June 15, 2021. Distance to road is calculated based on world's major roads which were downloaded from [www.openstreetmap.org](http://www.openstreetmap.org). NDVI is obtained from MODIS product (MOD13Q1 V6). Precipitation data source is the ERA5-Land Hourly – ECMWF Climate Reanalysis dataset.

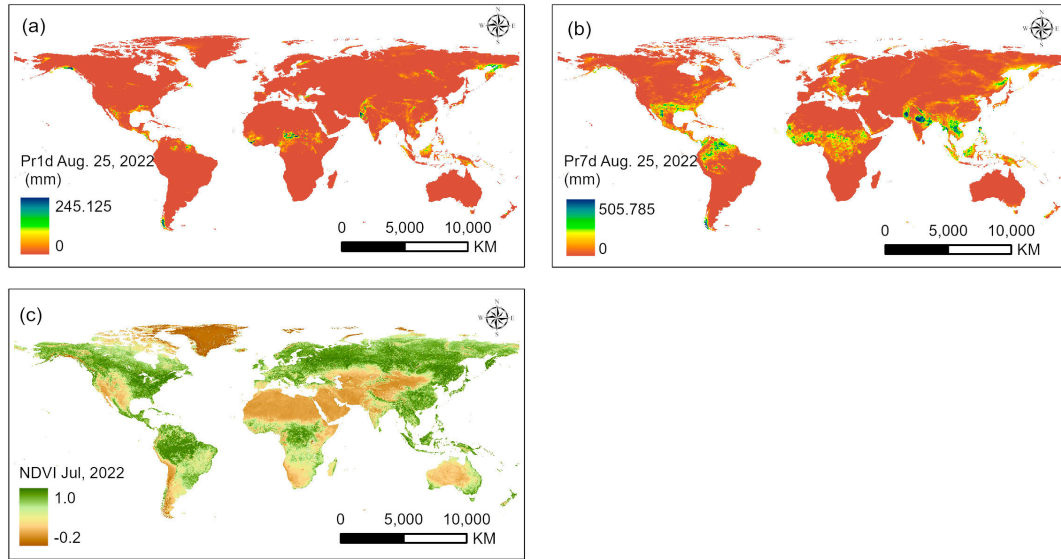

**Figure S3** (a) Pr1d August 25, 2022, (b) Pr7d August 25, 2022, and (c) NDVI Jul, 2022

Note: the land cover data for 2020 was used here (**Figure S1i**). Precipitation data source is the ERA5-Land Hourly – ECMWF Climate Reanalysis dataset. NDVI was obtained from MODIS product (MOD13Q1 V6).

## References:

1. Kirschbaum, D.B.; Adler, R.; Hong, Y.; Hill, S.; Lerner-Lam, A. A Global Landslide Catalog for Hazard Applications: Method, Results, and Limitations. *Nat. Hazards* 2010, 52, 561–575.
2. Juang, C.S.; Stanley, T.A.; Kirschbaum, D.B. Using Citizen Science to Expand the Global Map of Landslides: Introducing the Cooperative Open Online Landslide Repository (COOLR). *PloS One* 2019, 14, e0218657.
3. Leal Villamil, J.; Perez Gomez, U.; Ortiz Lozano, N.E. Spatio-Temporal Distribution of Slides (1999-2015) in Combeima's River Hydrographic Basin, Colombia. *Rev. Geogr. Venez.* 2018, 59, 346–365.
4. Monsieurs, E.; Jacobs, L.; Michellier, C.; Basimike Tchangaboba, J.; Ganza, G.B.; Kervyn, F.; Maki Mateso, J.-C.; Mugaruka Bibentyo, T.; Kalikone Buzera, C.; Nahimana, L. Landslide Inventory for Hazard Assessment in a Data-Poor Context: A Regional-Scale Approach in a Tropical African Environment. *Landslides* 2018, 15, 2195–2209.
5. Pesevski, I.; Jovanovski, M.; Nedelkovska, N. Republic of Macedonia Database.
6. NASA SERVIR Science Coordination Office; Mekong SERVIR-Mekong Myanmar Mapathon Landslides.
7. Klimeš, J.; Stemberk, J.; Blahut, J.; Krejčí, V.; Krejčí, O.; Hartvich, F.; Kycl, P. Challenges for Landslide Hazard and Risk Management in 'Low-Risk' Regions, Czech Republic—Landslide Occurrences and Related Costs (IPL Project No. 197). *Landslides* 2017, 14, 771–780.
8. Tanyaş, H.; Kirschbaum, D.; Lombardo, L. Capturing the Footprints of Ground Motion in the Spatial Distribution of Rainfall-Induced Landslides. *Bull. Eng. Geol. Environ.* 2021, 80, 4323–4345.
9. Benz, G.; Stanley, T. Pokot Landslide Inventory.
10. Amatya, P.; Kirschbaum, D.; Stanley, T. Rainfall-induced Landslide Inventories for Lower Mekong Based on Planet Imagery and a Semi-automatic Mapping Method. *Geosci. Data J.* 2022.
11. Tavoularis, N.; Papathanassiou, G.; Ganas, A.; Argyrakis, P. Development of the Landslide Susceptibility Map of Attica Region, Greece, Based on the Method of Rock Engineering System. *Land* 2021, 10, 148.
